# Supplementary material
Source: PubMed Central journal article supplement (PMC4791033)
Supplement: pnas.1520376113.st01.pdf [file pnas.1520376113.st01.pdf]

**Table S1: Gene Ontology enrichment of the top 200 genes correlated with *Esr1* and *Gr* in 12 brain regions.**

|                                                  | <i>Esr1</i>                                                                                                              |                                                            | <i>Gr</i>                                                            |                                                 |          |
|--------------------------------------------------|--------------------------------------------------------------------------------------------------------------------------|------------------------------------------------------------|----------------------------------------------------------------------|-------------------------------------------------|----------|
|                                                  | Term                                                                                                                     | P-value                                                    | Term                                                                 | P-value                                         |          |
| Cerebellum (CB)                                  | synaptic transmission (GO:0007268)                                                                                       | 5.08E-05                                                   | regulation of receptor internalization (GO:0002090)                  | 4.39E-03                                        |          |
|                                                  | regulation of membrane potential (GO:0042391)                                                                            | 1.20E-04                                                   | glucose catabolic process (GO:0006007)                               | 1.48E-02                                        |          |
|                                                  | calcium ion import (GO:0070509)                                                                                          | 4.63E-04                                                   | sympathetic nervous system development (GO:0048485)                  | 1.48E-02                                        |          |
|                                                  | regulation of type 2 immune response (GO:0002828)                                                                        | 2.23E-03                                                   | regulation of early endosome to late endosome transport (GO:2000641) | 7.78E-03                                        |          |
|                                                  | single-organism behavior (GO:0044708)                                                                                    | 1.46E-03                                                   | intracellular protein transmembrane transport (GO:0065002)           | 5.67E-03                                        |          |
|                                                  | neuropeptide hormone activity (GO:0005184)                                                                               | 2.25E-03                                                   | RNA polymerase II transcription corepressor activity (GO:0001106)    | 2.20E-03                                        |          |
|                                                  | neuropeptide receptor binding (GO:0071855)                                                                               | 3.09E-03                                                   | ATPase activator activity (GO:0001671)                               | 1.03E-02                                        |          |
|                                                  | peptidase activator activity (GO:0016504)                                                                                | 7.71E-03                                                   | heparan sulfate sulfotransferase activity (GO:0034483)               | 1.03E-02                                        |          |
|                                                  | gated channel activity (GO:0022836)                                                                                      | 6.79E-03                                                   | transcription corepressor activity (GO:0003714)                      | 4.96E-03                                        |          |
|                                                  | hormone activity (GO:0005179)                                                                                            | 1.94E-03                                                   | insulin-like growth factor receptor binding (GO:0005159)             | 1.16E-02                                        |          |
| Cortical subplate (CTXsp)                        | regulation of hormone levels (GO:0010817)                                                                                | 1.15E-04                                                   | alkali metal ion binding (GO:0031420)                                | 8.09E-03                                        |          |
|                                                  | pattern specification process (GO:0007389)                                                                               | 7.26E-05                                                   | potassium ion binding (GO:0030955)                                   | 4.34E-03                                        |          |
|                                                  | regionalization (GO:0003002)                                                                                             | 1.99E-04                                                   | death receptor activity (GO:0005035)                                 | 6.09E-03                                        |          |
|                                                  | neurogenesis (GO:0022008)                                                                                                | 3.64E-04                                                   | prenyltransferase activity (GO:0004659)                              | 1.04E-02                                        |          |
|                                                  | negative regulation of embryonic development (GO:0045992)                                                                | 1.24E-03                                                   | MAP kinase activity (GO:0004707)                                     | 9.20E-03                                        |          |
|                                                  | RNA polymerase II core promoter proximal region sequence-specific DNA binding transcription factor activity (GO:0000982) | 1.36E-03                                                   | peroxisomal transport (GO:0043574)                                   | 8.18E-04                                        |          |
|                                                  | receptor antagonist activity (GO:0048019)                                                                                | 4.51E-03                                                   | protein localization to peroxisome (GO:0072662)                      | 1.21E-02                                        |          |
|                                                  | receptor inhibitor activity (GO:0030547)                                                                                 | 5.23E-03                                                   | protein targeting to peroxisome (GO:0006625)                         | 1.21E-02                                        |          |
|                                                  | neurotransmitter binding (GO:0042165)                                                                                    | 9.58E-03                                                   | membrane hyperpolarization (GO:0060081)                              | 2.22E-03                                        |          |
|                                                  | excitatory extracellular ligand-gated ion channel activity (GO:0005231)                                                  | 7.46E-03                                                   | aerobic respiration (GO:0009060)                                     | 2.10E-02                                        |          |
|                                                  | Hippocampal formation (HBE)                                                                                              | uterus development (GO:0060065)                            | 5.96E-06                                                             | calcium channel regulator activity (GO:0005246) | 3.30E-04 |
|                                                  |                                                                                                                          | maternal process involved in female pregnancy (GO:0060135) | 1.82E-04                                                             | MAP kinase phosphatase activity (GO:0033549)    | 7.37E-04 |
| polyol catabolic process (GO:0046174)            |                                                                                                                          | 9.22E-03                                                   | channel regulator activity (GO:0016247)                              | 5.82E-04                                        |          |
| dopaminergic neuron differentiation (GO:0071542) |                                                                                                                          | 5.94E-03                                                   | receptor signaling protein activity (GO:0005057)                     | 2.56E-04                                        |          |
| regulation of hair cycle (GO:0042634)            |                                                                                                                          | 1.01E-02                                                   | substrate-specific channel activity (GO:0022838)                     | 2.15E-03                                        |          |
| plus-end-directed microtubule motor              |                                                                                                                          | 7.04E-03                                                   | single-organism behavior (GO:0044708)                                | 1.87E-06                                        |          |

|                   |                                                                                                       |          |                                                                                           |          |
|-------------------|-------------------------------------------------------------------------------------------------------|----------|-------------------------------------------------------------------------------------------|----------|
|                   | activity (GO:0008574)                                                                                 |          |                                                                                           |          |
|                   | neurotransmitter:sodium symporter activity (GO:0005328)                                               | 8.57E-03 | gamma-aminobutyric acid signaling pathway (GO:0007214)                                    | 1.07E-05 |
|                   | immunoglobulin binding (GO:0019865)                                                                   | 1.11E-02 | regulation of synaptic transmission (GO:0050804)                                          | 1.46E-05 |
|                   | neurotransmitter transporter activity (GO:0005326)                                                    | 1.30E-02 | behavior (GO:0007610)                                                                     | 2.14E-05 |
|                   | hyaluronic acid binding (GO:0005540)                                                                  | 1.11E-02 | cognition (GO:0050890)                                                                    | 7.02E-06 |
| Hypothalamus (HY) | feeding behavior (GO:0007631)                                                                         | 1.31E-04 | regulation of oligodendrocyte differentiation (GO:0048713)                                | 1.31E-03 |
|                   | pigment cell differentiation (GO:0050931)                                                             | 1.47E-03 | circadian behavior (GO:0048512)                                                           | 1.91E-03 |
|                   | melanocyte differentiation (GO:0030318)                                                               | 1.17E-03 | rhythmic behavior (GO:0007622)                                                            | 2.27E-03 |
|                   | insulin-like growth factor receptor signaling pathway (GO:0048009)                                    | 7.80E-03 | positive regulation of glial cell differentiation (GO:0045687)                            | 1.31E-03 |
|                   | adult feeding behavior (GO:0008343)                                                                   | 4.38E-03 | positive regulation of mesenchymal cell proliferation (GO:0002053)                        | 2.47E-04 |
|                   | peptide hormone binding (GO:0017046)                                                                  | 3.63E-03 | cysteine-type endopeptidase inhibitor activity involved in apoptotic process (GO:0043027) | 4.82E-04 |
|                   | insulin receptor binding (GO:0005158)                                                                 | 3.35E-03 | acid phosphatase activity (GO:0003993)                                                    | 3.92E-03 |
|                   | ligand-gated ion channel activity (GO:0015276)                                                        | 1.95E-03 | cysteine-type endopeptidase regulator activity involved in apoptotic process (GO:0043028) | 2.85E-03 |
|                   | ligand-gated channel activity (GO:0022834)                                                            | 1.95E-03 | glycoprotein binding (GO:0001948)                                                         | 2.62E-03 |
|                   | growth factor binding (GO:0019838)                                                                    | 4.99E-03 | heparan sulfate proteoglycan binding (GO:0043395)                                         | 7.20E-03 |
| Isocortex         | monoamine transport (GO:0015844)                                                                      | 8.19E-04 | negative regulation of phosphorylation (GO:0042326)                                       | 3.32E-07 |
|                   | positive regulation of myeloid leukocyte cytokine production involved in immune response (GO:0061081) | 4.06E-03 | negative regulation of phosphorus metabolic process (GO:0010563)                          | 3.11E-07 |
|                   | oocyte development (GO:0048599)                                                                       | 5.41E-03 | negative regulation of protein kinase activity (GO:0006469)                               | 8.72E-07 |
|                   | central nervous system neuron development (GO:0021954)                                                | 1.86E-03 | negative regulation of kinase activity (GO:0033673)                                       | 1.69E-06 |
|                   | type B pancreatic cell development (GO:0003323)                                                       | 4.06E-03 | negative regulation of protein phosphorylation (GO:0001933)                               | 3.80E-06 |
|                   | immunoglobulin binding (GO:0019865)                                                                   | 8.76E-04 | phosphoric ester hydrolase activity (GO:0042578)                                          | 4.04E-05 |
|                   | hydrolase activity, hydrolyzing N-glycosyl compounds (GO:0016799)                                     | 1.42E-02 | phosphoprotein phosphatase activity (GO:0004721)                                          | 2.25E-05 |
|                   | dicarboxylic acid transmembrane transporter activity (GO:0005310)                                     | 1.66E-02 | MAP kinase phosphatase activity (GO:0033549)                                              | 9.84E-04 |
|                   | MAP kinase activity (GO:0004707)                                                                      | 6.44E-03 | Hsp70 protein binding (GO:0030544)                                                        | 2.23E-03 |
|                   | sodium channel regulator activity (GO:0017080)                                                        | 2.04E-02 | phosphatase activity (GO:0016791)                                                         | 6.84E-04 |
| Midbrain (MB)     | H4 histone acetyltransferase activity (GO:0010485)                                                    | 6.86E-04 | regulation of postsynaptic membrane potential (GO:0060078)                                | 1.48E-07 |
|                   | neurotransmitter transporter activity (GO:0005326)                                                    | 2.30E-03 | regulation of dendritic spine morphogenesis (GO:0061001)                                  | 3.39E-06 |
|                   | cofactor binding (GO:0048037)                                                                         | 1.60E-03 | regulation of membrane potential                                                          | 1.70E-06 |

|                                   |                                                                                                          |                                   |                                                                                                                                                             |          |
|-----------------------------------|----------------------------------------------------------------------------------------------------------|-----------------------------------|-------------------------------------------------------------------------------------------------------------------------------------------------------------|----------|
|                                   | structural constituent of ribosome (GO:0003735)                                                          | 1.32E-03                          | (GO:0042391)<br>regulation of excitatory postsynaptic membrane potential (GO:0060079)                                                                       | 1.07E-06 |
|                                   | peptide hormone binding (GO:0017046)                                                                     | 5.27E-03                          | positive regulation of excitatory postsynaptic membrane potential (GO:2000463)                                                                              | 4.35E-05 |
|                                   | cholesterol biosynthetic process (GO:0006695)                                                            | 5.50E-09                          | ephrin receptor binding (GO:0046875)                                                                                                                        | 9.17E-07 |
|                                   | sterol biosynthetic process (GO:0016126)                                                                 | 1.41E-08                          | metal ion transmembrane transporter activity (GO:0046873)                                                                                                   | 3.64E-04 |
|                                   | organic hydroxy compound biosynthetic process (GO:1901617)                                               | 1.13E-06                          | kinase binding (GO:0019900)                                                                                                                                 | 6.07E-04 |
|                                   | organic hydroxy compound metabolic process (GO:1901615)                                                  | 2.13E-05                          | potassium ion transmembrane transporter activity (GO:0015079)                                                                                               | 3.52E-04 |
|                                   | isoprenoid biosynthetic process (GO:0008299)                                                             | 1.23E-04                          | gated channel activity (GO:0022836)                                                                                                                         | 9.05E-04 |
| Medulla (MY)                      | learning or memory (GO:0007611)                                                                          | 3.62E-08                          | oxidoreductase activity, acting on a sulfur group of donors, NAD(P) as acceptor (GO:0016668)                                                                | 4.21E-03 |
|                                   | cognition (GO:0050890)                                                                                   | 1.64E-07                          | transforming growth factor beta receptor binding (GO:0005160)                                                                                               | 1.65E-02 |
|                                   | regulation of synaptic transmission (GO:0050804)                                                         | 2.40E-06                          | enzyme activator activity (GO:0008047)                                                                                                                      | 4.35E-03 |
|                                   | memory (GO:0007613)                                                                                      | 2.12E-06                          | protein homodimerization activity (GO:0042803)                                                                                                              | 3.22E-03 |
|                                   | single-organism behavior (GO:0044708)                                                                    | 2.28E-05                          | RNA polymerase II distal enhancer sequence-specific DNA binding transcription factor activity involved in positive regulation of transcription (GO:0001205) | 1.78E-02 |
|                                   | protein kinase C activity (GO:0004697)                                                                   | 6.70E-04                          | serine family amino acid catabolic process (GO:0009071)                                                                                                     | 3.45E-04 |
|                                   | clathrin binding (GO:0030276)                                                                            | 3.31E-02                          | L-serine metabolic process (GO:0006563)                                                                                                                     | 8.68E-05 |
|                                   | HMG box domain binding (GO:0071837)                                                                      | 1.44E-02                          | response to reactive oxygen species (GO:0000302)                                                                                                            | 2.27E-04 |
|                                   | neurotransmitter:sodium symporter activity (GO:0005328)                                                  | 1.59E-02                          | excretion (GO:0007588)                                                                                                                                      | 7.08E-04 |
|                                   | semaphorin receptor binding (GO:0030215)                                                                 | 5.26E-03                          | placenta development (GO:0001890)                                                                                                                           | 4.06E-03 |
| Olfactory areas (OLF)             | T cell mediated immunity (GO:0002456)                                                                    | 1.12E-03                          | phosphatidylinositol dephosphorylation (GO:0046856)                                                                                                         | 1.21E-03 |
|                                   | alpha-beta T cell differentiation involved in immune response (GO:0002293)                               | 7.33E-04                          | inactivation of MAPK activity (GO:0000188)                                                                                                                  | 5.19E-04 |
|                                   | T cell differentiation involved in immune response (GO:0002292)                                          | 7.33E-04                          | negative regulation of protein modification process (GO:0031400)                                                                                            | 6.09E-04 |
|                                   | alpha-beta T cell activation involved in immune response (GO:0002287)                                    | 7.33E-04                          | negative regulation of protein phosphorylation (GO:0001933)                                                                                                 | 6.80E-04 |
|                                   | G-protein coupled receptor signaling pathway, coupled to cyclic nucleotide second messenger (GO:0007187) | 1.05E-04                          | negative regulation of transferase activity (GO:0051348)                                                                                                    | 1.30E-03 |
|                                   | heparan sulfate proteoglycan binding (GO:0043395)                                                        | 5.76E-04                          | MAP kinase phosphatase activity (GO:0033549)                                                                                                                | 1.00E-03 |
| proteoglycan binding (GO:0043394) | 1.93E-03                                                                                                 | phosphatase activity (GO:0016791) | 7.24E-04                                                                                                                                                    |          |

|                 |                                                                                          |          |                                                                                           |          |
|-----------------|------------------------------------------------------------------------------------------|----------|-------------------------------------------------------------------------------------------|----------|
|                 | excitatory extracellular ligand-gated ion channel activity (GO:0005231)                  | 9.02E-04 | protein tyrosine phosphatase activity (GO:0004725)                                        | 1.07E-03 |
|                 | neurotransmitter receptor activity (GO:0030594)                                          | 5.02E-04 | calcium-dependent protein binding (GO:0048306)                                            | 4.65E-04 |
|                 | protein phosphatase binding (GO:0019903)                                                 | 1.40E-03 | phosphoric ester hydrolase activity (GO:0042578)                                          | 2.01E-03 |
| Pons (P)        | cell-cell adhesion (GO:0098609)                                                          | 4.17E-07 | positive regulation of cardiac muscle hypertrophy (GO:0010613)                            | 4.86E-04 |
|                 | cell-cell adhesion via plasma-membrane adhesion molecules (GO:0098742)                   | 3.96E-07 | positive regulation of muscle hypertrophy (GO:0014742)                                    | 4.86E-04 |
|                 | homophilic cell adhesion via plasma membrane adhesion molecules (GO:0007156)             | 1.52E-06 | positive regulation of cellular component movement (GO:0051272)                           | 3.57E-04 |
|                 | heterophilic cell-cell adhesion via plasma membrane cell adhesion molecules (GO:0007157) | 3.35E-04 | positive regulation of locomotion (GO:0040017)                                            | 4.38E-04 |
|                 | regulation of cell adhesion (GO:0030155)                                                 | 3.98E-04 | pigmentation (GO:0043473)                                                                 | 4.42E-04 |
|                 | excitatory extracellular ligand-gated ion channel activity (GO:0005231)                  | 1.46E-03 | cGMP binding (GO:0030553)                                                                 | 2.91E-05 |
|                 | extracellular ligand-gated ion channel activity (GO:0005230)                             | 9.06E-04 | RAGE receptor binding (GO:0050786)                                                        | 2.18E-04 |
|                 | extracellular-glutamate-gated ion channel activity (GO:0005234)                          | 1.51E-02 | cyclic nucleotide binding (GO:0030551)                                                    | 3.91E-04 |
|                 | ionotropic glutamate receptor activity (GO:0004970)                                      | 1.66E-02 | sodium:dicarboxylate symporter activity (GO:0017153)                                      | 4.68E-03 |
|                 | hexosaminidase activity (GO:0015929)                                                     | 1.10E-02 | calcium ion binding (GO:0005509)                                                          | 3.48E-03 |
| Palladium (PAL) | toxin metabolic process (GO:0009404)                                                     | 1.71E-04 | 2-oxoglutarate metabolic process (GO:0006103)                                             | 5.47E-04 |
|                 | synaptic transmission (GO:0007268)                                                       | 2.72E-05 | regulation of steroid hormone biosynthetic process (GO:0090030)                           | 3.89E-04 |
|                 | response to steroid hormone (GO:0048545)                                                 | 1.22E-04 | multicellular organismal aging (GO:0010259)                                               | 5.47E-04 |
|                 | positive regulation of secretion (GO:0051047)                                            | 4.89E-05 | brown fat cell differentiation (GO:0050873)                                               | 2.50E-04 |
|                 | behavior (GO:0007610)                                                                    | 9.85E-05 | steroid metabolic process (GO:0008202)                                                    | 3.03E-04 |
|                 | neuropeptide hormone activity (GO:0005184)                                               | 8.81E-08 | endodeoxyribonuclease activity, producing 5'-phosphomonoesters (GO:0016888)               | 1.02E-02 |
|                 | GABA-A receptor activity (GO:0004890)                                                    | 1.07E-06 | GTPase activating protein binding (GO:0032794)                                            | 7.96E-03 |
|                 | GABA receptor activity (GO:0016917)                                                      | 2.00E-06 | anion:anion antiporter activity (GO:0015301)                                              | 2.31E-02 |
|                 | hormone activity (GO:0005179)                                                            | 8.71E-06 | receptor signaling complex scaffold activity (GO:0030159)                                 | 1.54E-02 |
|                 | extracellular ligand-gated ion channel activity (GO:0005230)                             | 4.02E-05 | cysteine-type endopeptidase inhibitor activity involved in apoptotic process (GO:0043027) | 1.68E-02 |
| Striatum (STR)  | CD4-positive, alpha-beta T cell differentiation (GO:0043367)                             | 1.13E-04 | synaptic transmission (GO:0007268)                                                        | 1.12E-07 |
|                 | epithelial cell maturation (GO:0002070)                                                  | 7.15E-04 | potassium ion transmembrane transport (GO:0071805)                                        | 4.08E-06 |
|                 | T-helper cell differentiation (GO:0042093)                                               | 6.06E-04 | cellular potassium ion transport (GO:0071804)                                             | 4.08E-06 |
|                 | alpha-beta T cell differentiation involved in immune response (GO:0002293)               | 8.35E-04 | potassium ion transport (GO:0006813)                                                      | 1.36E-05 |

|               |                                                                                                             |          |                                                                             |          |
|---------------|-------------------------------------------------------------------------------------------------------------|----------|-----------------------------------------------------------------------------|----------|
|               | neuron projection guidance (GO:0097485)                                                                     | 2.51E-04 | regulation of ion transmembrane transport (GO:0034765)                      | 1.63E-04 |
|               | ligand-activated sequence-specific DNA binding RNA polymerase II transcription factor activity (GO:0004879) | 1.38E-04 | potassium ion transmembrane transporter activity (GO:0015079)               | 6.99E-06 |
|               | steroid hormone receptor activity (GO:0003707)                                                              | 2.44E-04 | potassium channel activity (GO:0005267)                                     | 1.77E-05 |
|               | 14-3-3 protein binding (GO:0071889)                                                                         | 8.64E-04 | voltage-gated potassium channel activity (GO:0005249)                       | 2.01E-05 |
|               | chloride channel activity (GO:0005254)                                                                      | 6.68E-04 | inward rectifier potassium channel activity (GO:0005242)                    | 8.04E-05 |
|               | anion channel activity (GO:0005253)                                                                         | 1.05E-03 | monovalent inorganic cation transmembrane transporter activity (GO:0015077) | 3.48E-04 |
| Thalamus (TH) | synaptic transmission (GO:0007268)                                                                          | 3.17E-06 | regulation of transmembrane transporter activity (GO:0022898)               | 3.10E-06 |
|               | chloride transmembrane transport (GO:1902476)                                                               | 8.57E-06 | regulation of ion transmembrane transporter activity (GO:0032412)           | 2.43E-06 |
|               | chloride transport (GO:0006821)                                                                             | 1.50E-05 | regulation of transporter activity (GO:0032409)                             | 6.15E-06 |
|               | nephron epithelium morphogenesis (GO:0072088)                                                               | 1.74E-04 | regulation of metal ion transport (GO:0010959)                              | 1.44E-05 |
|               | nephron tubule morphogenesis (GO:0072078)                                                                   | 1.74E-04 | regulation of ion transmembrane transport (GO:0034765)                      | 2.82E-05 |
|               | extracellular ligand-gated ion channel activity (GO:0005230)                                                | 3.15E-08 | quaternary ammonium group binding (GO:0050997)                              | 4.82E-04 |
|               | ligand-gated ion channel activity (GO:0015276)                                                              | 7.41E-07 | steroid hormone receptor activity (GO:0003707)                              | 4.85E-04 |
|               | ligand-gated channel activity (GO:0022834)                                                                  | 7.41E-07 | SMAD binding (GO:0046332)                                                   | 1.03E-03 |
|               | excitatory extracellular ligand-gated ion channel activity (GO:0005231)                                     | 5.99E-06 | phospholipid binding (GO:0005543)                                           | 1.50E-03 |
|               | chloride transmembrane transporter activity (GO:0015108)                                                    | 1.35E-05 | ephrin receptor binding (GO:0046875)                                        | 5.41E-03 |
