# Supplementary material
Source: PubMed Central journal article supplement (PMC4791033)
Supplement: pnas.1520376113.st02.pdf [file pnas.1520376113.st02.pdf]

**Table S2: Coexpression of sexually dimorphic genes with *Esr1* (coronal experiment) in the whole brain.**

| Gene           | Whole Brain |                  |             |                 | Hypothalamus |                  |                         |                 |
|----------------|-------------|------------------|-------------|-----------------|--------------|------------------|-------------------------|-----------------|
| Gene           | Correlation | Correlation Rank | Expression* | Expression Rank | Correlation  | Correlation Rank | Expression <sup>§</sup> | Expression Rank |
| <i>Irs4</i>    | 0.51        | 1                | 0.41        | 14362           | 0.82         | 1                | 7.24                    | 14              |
| <i>Pak3</i>    | 0.39        | 9                | 1.26        | 9650            | 0.54         | 64               | 1.73                    | 990             |
| <i>Gpr165</i>  | 0.39        | 10               | 1.60        | 8662            | 0.55         | 48               | 5.09                    | 50              |
| <i>Ecel1</i>   | 0.36        | 17               | 2.25        | 7303            | 0.41         | 404              | 4.72                    | 60              |
| <i>Glr3</i>    | 0.26        | 87               | 0.60        | 12639           | 0.48         | 159              | 2.75                    | 251             |
| <i>Gabrg1</i>  | 0.26        | 89               | 0.79        | 11511           | 0.29         | 1467             | 2.59                    | 315             |
| <i>Nnat</i>    | 0.24        | 123              | 6.42        | 3277            | 0.29         | 1609             | 2.33                    | 431             |
| <i>Cartpt</i>  | 0.23        | 160              | 0.80        | 11467           | 0.18         | 3716             | 3.04                    | 210             |
| <i>Greb1</i>   | 0.17        | 452              | 0.36        | 14918           | 0.41         | 414              | 1.13                    | 3427            |
| <i>Rps6ka6</i> | 0.16        | 480              | 0.78        | 11575           | 0.41         | 418              | 1.30                    | 2189            |
| <i>Syt14</i>   | 0.16        | 513              | 0.18        | 18245           | 0.49         | 128              | 1.60                    | 1194            |
| <i>Brs3</i>    | 0.11        | 1313             | 0.23        | 17160           | 0.48         | 141              | 1.19                    | 2871            |
| <i>Cckar</i>   | 0.10        | 1555             | 1.37        | 9300            | -0.09        | 17153            | 0.96                    | 5518            |
| <i>Dgkk</i>    | -0.02       | 15812            | 1.52        | 8884            | 0.11         | 5828             | 0.67                    | 11142           |
| <i>Chadl</i>   | -0.05       | 20934            | 0.25        | 16690           | -0.15        | 21688            | 0.56                    | 13760           |

\* Average expression across all brain voxels.

§ Average expression across all hypothalamus voxels, normalized by the average expression across the whole brain.
