# Supplementary material
Source: PubMed Central journal article supplement (PMC4791033)
Supplement: pnas.1520376113.st03.pdf [file pnas.1520376113.st03.pdf]

**Table S3: Response of *Ers1*-coexpressed and noncoexpressed genes to DES treatment in the anterior and posterior hypothalamus.**

| Gene          | Correlation | Correlation Rank | Expression* | Expression Rank | Anterior HY (fold change) | Anterior HY (p-value) | Posterior HY (fold change) | Posterior HY (p-value) |
|---------------|-------------|------------------|-------------|-----------------|---------------------------|-----------------------|----------------------------|------------------------|
| <b>Irs4</b>   | 0.79        | 1                | 7.24        | 1               | <b>1.45</b>               | 0.04                  | <b>1.26</b>                | 0.19                   |
| Fut8          | 0.75        | 2                | 0.36        | 3367            | 1.10                      | 0.32                  | 1.34                       | 0.23                   |
| <b>Gdgd2</b>  | 0.66        | 4                | 3.54        | 42              | <b>1.34</b>               | 0.04                  | <b>1.08</b>                | 0.24                   |
| <b>Ngb</b>    | 0.64        | 6                | 6.24        | 8               | <b>1.44</b>               | 0.05                  | <b>1.24</b>                | 0.21                   |
| Rfx7          | 0.63        | 7                | 0.98        | 1195            | 1.16                      | 0.24                  | 1.08                       | 0.14                   |
| <b>Adck4</b>  | 0.62        | 8                | 1.98        | 141             | <b>1.31</b>               | 0.05                  | <b>1.30</b>                | 0.09                   |
| Ltbp4         | 0.60        | 9                | 1.13        | 737             | 1.20                      | 0.12                  | 0.87                       | 0.14                   |
| <b>Magel2</b> | 0.57        | 11               | 5.63        | 11              | <b>1.47</b>               | 0.06                  | <b>1.25</b>                | 0.18                   |
| <b>Unc5d</b>  | 0.57        | 13               | 1.52        | 284             | <b>1.32</b>               | 0.10                  | <b>1.34</b>                | 0.08                   |
| Bhlhb9        | 0.57        | 15               | 0.62        | 2473            | 1.17                      | 0.11                  | 1.02                       | 0.39                   |
| Mtss1         | 4.40E-05    | 2237             | 0.70        | 2231            | 1.21                      | 0.17                  | 1.18                       | 0.01                   |
| <b>Ern2</b>   | 1.96E-04    | 2235             | 0.40        | 3210            | <b>1.70</b>               | 0.01                  | <b>1.18</b>                | 0.20                   |
| Olig2         | 3.04E-04    | 2234             | 0.83        | 1722            | 1.12                      | 0.23                  | 0.88                       | 0.25                   |
| Pip5k1c       | 3.94E-04    | 2232             | 0.73        | 2119            | 1.15                      | 0.22                  | 1.01                       | 0.46                   |
| Megf11        | 7.35E-04    | 2230             | 0.34        | 3423            | 1.27                      | 0.04                  | 0.91                       | 0.17                   |
| <b>Chat</b>   | 7.96E-04    | 2229             | 1.33        | 423             | <b>1.36</b>               | 0.20                  | <b>1.12</b>                | 0.40                   |
| Ltb           | 8.01E-04    | 2228             | 0.24        | 3787            | 1.18                      | 0.19                  | 0.95                       | 0.39                   |
| <b>Gnas</b>   | 9.13E-04    | 2227             | 1.10        | 803             | <b>1.33</b>               | 0.04                  | <b>0.92</b>                | 0.20                   |
| Tmem150c      | 1.07E-03    | 2225             | 0.76        | 1992            | 1.27                      | 0.10                  | 0.90                       | 0.16                   |
| Cyb5r1        | 1.52E-03    | 2223             | 0.82        | 1778            | 1.20                      | 0.15                  | 1.11                       | 0.22                   |

\* Average expression across all hypothalamus voxels, normalized by the average expression across the whole brain.
