# Supplementary material
Source: PubMed Central journal article supplement (PMC4791033)
Supplement: pnas.1520376113.st04.pdf [file pnas.1520376113.st04.pdf]

**Table S4: GR targets in the hippocampus validated by CHIP-seq.**

|    | Gene symbol | Correlation Rank | Correlation | chr   | start     | end       | -LOG10(q-value) |
|----|-------------|------------------|-------------|-------|-----------|-----------|-----------------|
| 1  | Itpr1       | 4                | 0.78        | chr4  | 204768526 | 204768670 | 12.56           |
| 2  | Ttyh1       | 8                | 0.77        | chr1  | 74799541  | 74799835  | 10.49           |
| 3  | Ptn         | 26               | 0.72        | chr4  | 64153042  | 64153257  | 21.54           |
| 4  | Hecw2       | 28               | 0.72        | chr9  | 60143115  | 60143327  | 6.48            |
| 5  | RGD1306534  | 31               | 0.71        | chr3  | 169558683 | 169558795 | 6.52            |
| 6  | Ntrk2       | 36               | 0.70        | chr17 | 8206110   | 8206216   | 10.50           |
| 7  | Hivep1      | 62               | 0.68        | chr17 | 24367329  | 24367491  | 5.24            |
| 8  | Rab11fip4   | 69               | 0.67        | chr10 | 64629571  | 64629807  | 25.34           |
| 9  | Arntl       | 71               | 0.67        | chr1  | 185027529 | 185027725 | 22.82           |
| 10 | Galnt9      | 74               | 0.67        | chr12 | 53884426  | 53884529  | 8.48            |
| 11 | Plcl2       | 78               | 0.66        | chr9  | 1764414   | 1764522   | 10.50           |
| 12 | RGD1560050  | 115              | 0.64        | chr15 | 108459125 | 108459244 | 8.48            |
| 13 | RGD1305961  | 117              | 0.64        | chr6  | 50704731  | 50704884  | 48.69           |
| 14 | Sdk2        | 131              | 0.63        | chr10 | 101994116 | 101994399 | 10.50           |
| 15 | Fhod3       | 176              | 0.61        | chr18 | 16990799  | 16990917  | 10.50           |
| 16 | Dcip2       | 180              | 0.61        | chr9  | 18406124  | 18406371  | 46.11           |
